# Supplementary material for: Reactive oxygen species (ROS) as pleiotropic physiological signalling agents
Source: Springer Nature journal article supplement (doi:10.1038/s41580-020-0230-3), 2020-03-30
Supplement: 41580_2020_230_MOESM1_ESM.pdf [file 41580_2020_230_MOESM1_ESM.pdf]

# **Reactive oxygen species (ROS) as pleiotropic physiological signalling agents**

---

In the format provided by the authors and unedited

---

**Supplementary Table 1** Enzyme-generated reactive oxygen species other than H<sub>2</sub>O<sub>2</sub> and O<sub>2</sub><sup>•-</sup>.

| <b>Name</b>                            | <b>Protein</b> | <b>Location</b>       | <b>Product</b>                                        |
|----------------------------------------|----------------|-----------------------|-------------------------------------------------------|
| Arachidonate 15-lipoxygenase           | LOX15          | C, PM                 | 15-HPETE                                              |
| Arachidonate 15-lipoxygenase-B         | LX15B          | N, C, PM, S           | 15-HPETE                                              |
| Arachidonate 12-lipoxygenase, 12S-type | LOX12          | C, PM                 | 12S-HPETE                                             |
| Arachidonate 12-lipoxygenase, 12R-type | LX12B          | C                     | 12R-HPETE                                             |
| Arachidonate 5-lipoxygenase            | LOX5           | N, C                  | 5-HPETE                                               |
| Lactoperoxidase                        | PERL           | S                     | HOSCN                                                 |
| Eosinophil peroxidase                  | PERE           | S                     | HOBr, HOSCN                                           |
| Myeloperoxidase                        | PERM           | S                     | HOCl, HOSCN                                           |
| Peroxidasin homolog                    | PXDN           | S                     | HOBr                                                  |
| Peroxidasin-like protein               | PXDNL          | S, C                  | Phenolic radicals                                     |
| Prostaglandin G/H synthase 1           | PGH1           | ER                    | Arachidonyl<br>endoperoxide<br>Singlet O <sub>2</sub> |
| Prostaglandin G/H synthase 2           | PGH2           | ER                    | Arachidonyl<br>endoperoxide                           |
| Nitric oxide synthase, brain           | NOS1           | PM                    | ·NO                                                   |
| Nitric oxide synthase, inducible       | NOS2           | C                     | ·NO                                                   |
| Nitric oxide synthase, endothelial     | NOS3           | PM, C, G,<br>caveolae | ·NO                                                   |

HOBr, hypobromous acid; HOCl, hypochlorous acid; HOSCN, hypothiocyanous acid;

HPETE, hydroperoxyeicosatetraenoic acid; ·NO, nitric oxide

Abbreviations for subcellular location: C, cytoplasm; ER, endoplasmic reticulum; G, Golgi; N, nucleus; PM, plasma membrane; S, secreted.
